# Supplementary material for: Profiling the Dead: Generating Microsatellite Data from Fossil Bones of Extinct Megafauna—Protocols, Problems, and Prospects
Source: PLoS One. 2011 Jan 31;6(1):e16670. doi: 10.1371/journal.pone.0016670 (PMC3031614; doi:10.1371/journal.pone.0016670)
Supplement: Table S1 — Seven non-polymorphic markers. Characteristics of an additional seven microsatellites that amplified well in moa but were excluded from this study because they proved monomorphic or dimorphic in the investigated Dinornis robustus samples. Shown here; the moa species in which the microsatellites were identified, repeat units as observed in the original GS-FLX clones, annealing temperatures in the 50-cycle PCR reaction from Allentoft et al. [2], and the primer sequences. * This primerpair was re-designed (shortened) from the generic bird microsatellite TG03-002, presented in Dawson et al. 2009 [43]. (XLS) [file pone.0016670.s003.xls]

## Sheet: Sheet1
Table S1
						No. detected alleles
Locus	Source taxon	Identified repeat	Ann. temp.	Forward 5'→ 3'	Reverse 5'→ 3'	in D. robustus
Moa_MA3	Dinornis robustus	(TC)10	52°	CATTTGATGCTAGAGAAAGTCTGTTT	CATCTGAACTGAGTGCTTTGCT	1
Moa_MA20	Anomalopteryx didiformis	(AC)11	55°	CTCATTTGCTCGCCAGAG	ATCAGCAGCAAGGGACATTA	2
Moa_MA24	Anomalopteryx didiformis	(GA)13	52°	CCTCTTTCTCACATAGCATGG	AGGTGAGAGGGAAGTAGTGTTC	2
Moa_MA25	Anomalopteryx didiformis	(CT)12	55°	TGCAGATTCGATTGTGAAGA	CAAAGCTTGCTTGCAGTGTA	2
Moa_MA31	Anomalopteryx didiformis	(CA)9	58°	CACATCTGCCTGGGTCTGT	AGGGCAACGTACAGTTTGGT	1
Moa_MA35	Anomalopteryx didiformis	(TA)9	60°	TCCACTGACAGACCCTTCTTC	AGCTCCTTTCCAGCCTCAAC	2
Moa_MA49a*	Chicken and zebrafinch	(AT)11 in zebrafinch	56°	GCCTTTTTGGTATGAGTATAGCTG	GCTGAAAGATCTAAGCGTGAAA	1
